# Supplementary material for: Microbe-mediated synthesis of defect-rich CeO2 nanoparticles with oxidase-like activity for colorimetric detection of l-penicillamine and glutathione
Source: Royal Society of Chemistry journal article supplement (doi:10.1039/d4nr03893b), 2024-12-27
Supplement: d4nr03893b1.pdf [file d4nr03893b1.pdf]

## Supporting Information

# Microbe-Mediated Synthesis of Defect-rich CeO<sub>2</sub> Nanoparticles with Oxidase-like Activity for Colorimetric Detection of L-penicillamine and Glutathione

*Nan Zhang<sup>a</sup>, Yingyan Du<sup>a</sup>, Zhidong Zhang<sup>d</sup>, Liying Zhu<sup>a,\*</sup>, Ling Jiang<sup>b,c</sup>*

<sup>a</sup>School of Chemistry and Molecular Engineering, Nanjing Tech University, Nanjing 211816, P. R. China

<sup>b</sup>College of Biotechnology and Pharmaceutical Engineering, State Key Laboratory of Materials-Oriented Chemical Engineering, Nanjing Tech University, Nanjing 211816, P. R. China

<sup>c</sup>College of Food Science and Light Industry, Nanjing Tech University, Nanjing 211816, P. R. China

<sup>d</sup>Xinjiang Key Laboratory of Special Environmental Microbiology, Institute of Applied Microbiology, Xinjiang Academy of Agricultural Sciences, Xinjiang 830091, P. R. China

**\*Corresponding Author**

E-mail:

[zlyhappy@njtech.edu.cn](mailto:zlyhappy@njtech.edu.cn)

## Contents

|                                                                                               |           |
|-----------------------------------------------------------------------------------------------|-----------|
| <b>Experimental Section .....</b>                                                             | <b>1</b>  |
| Reagents and materials.....                                                                   | 1         |
| Characterization. ....                                                                        | 1         |
| Oxidase-like Catalytic Activity of CeO <sub>2</sub> NPs.....                                  | 2         |
| Kinetic Measurements. ....                                                                    | 2         |
| Detection of L-PA and GSH. ....                                                               | 3         |
| Selectivity study of the CeO <sub>2</sub> -TMB system for the detection of L-PA and GSH. .... | 3         |
| Detection of L-PA and GSH in the Real Samples.....                                            | 4         |
| <b>Figure S1 .....</b>                                                                        | <b>5</b>  |
| <b>Figure S2 .....</b>                                                                        | <b>5</b>  |
| <b>Figure S3 .....</b>                                                                        | <b>6</b>  |
| <b>Figure S4 .....</b>                                                                        | <b>6</b>  |
| <b>Figure S5 .....</b>                                                                        | <b>7</b>  |
| <b>Table S1 .....</b>                                                                         | <b>8</b>  |
| <b>Table S2 .....</b>                                                                         | <b>8</b>  |
| <b>Table S3 .....</b>                                                                         | <b>9</b>  |
| <b>Table S4 .....</b>                                                                         | <b>10</b> |
| <b>Table S5 .....</b>                                                                         | <b>11</b> |
| <b>REFERENCES.....</b>                                                                        | <b>12</b> |

## Experimental Section

### Reagents and materials.

Ultrapure water was homemade and used in all experiments in the case of no additional instructions. Cerium(III) Acetate Hydrate ( $(\text{CH}_3\text{CO}_2)_3\text{Ce}\cdot x\text{H}_2\text{O}$ , 99.99%), 3,3',5,5'-tetramethylbenzidine (TMB, 99%), cerium(IV) sulfate ( $\text{Ce}(\text{SO}_4)_2$ , 99.95%), EDTA-2Na (98%), histidine (98%), 1,4-benzochinon (*p*-BQ, 99%), thiourea (99%), fructose (99%), lactose (98%), L-lysine (98%), L-serine (99%), L-tryptophan (99%), D-phenylalanine (99%), L-valine (99%), L-isoleucine (99%) and goat Serum were purchased from Shanghai Titan Technology Co.,Ltd., China. L-penicillamine (L-PA, >98%), Glutathione (GSH, >98%), calcium Acetate ( $\text{Ca}(\text{CH}_3\text{COO})_2$ , AR), magnesium acetate ( $\text{Mg}(\text{CH}_3\text{COO})_2$ , 98%), potassium acetate ( $\text{CH}_3\text{COOK}$ , 99.9%), and galactose (98%) were purchased from Shanghai Macklin Biochemical Co.,Ltd., China. Sodium chloride ( $\text{NaCl}$ , AR), sodium sulfate ( $\text{Na}_2\text{SO}_4$ , AR), sodium carbonate ( $\text{Na}_2\text{CO}_3$ , AR), sodium acetate ( $\text{CH}_3\text{COONa}$ , AR), sodium bicarbonate ( $\text{NaHCO}_3$ , AR), glacial acetic acid ( $\text{CH}_3\text{COOH}$ , AR), glucose (AR), sucrose (AR), and ethanol (AR) were purchased from Sinopharm Group Co.,Ltd., China. All the chemicals were used without any further purification.

### Characterization.

The morphology and structure were characterized by transmission electron microscope (TEM) (JEM-F200, JEOL, Japan). The high-resolution transmission electron microscope was used to obtain high-angle annular dark-field scanning transmission electron microscopy (HAADF-STEM) and element mapping images. The crystal structure was investigated by X-ray diffractometer (XRD) (MiniFlex600, Rigaku Corporation, Japan) in the scanning range of  $2\theta$  between  $20^\circ$  and  $80^\circ$  with copper  $\text{K}\alpha$  as the source of radiation. The surface chemical information was collected by X-ray photoelectron

spectroscopy (XPS) with Al-K $\alpha$  X-ray source (K-Alpha, Thermo Scientific, USA). The phase structure of the materials were characterized by Raman spectroscopy with 532 nm laser excitation (DXR2, Thermo Fisher Scientific, USA). The electron paramagnetic resonance signals were obtained on electron paramagnetic resonance spectrometer (EPR, Bruker, EMXplus6/1, Germany).

### **Oxidase-like Catalytic Activity of CeO<sub>2</sub> NPs.**

10  $\mu$ L CeO<sub>2</sub> NPs (10 mg/mL) and 20  $\mu$ L TMB (5 mM) were added into 970  $\mu$ L 0.2 M NaAc/HAc buffer (pH = 3.8). Then the reaction solution was incubated in a metal bath at 50°C for 20 min, and finally cooled in an ice bath for 10 min. The OXD-like activity of CeO<sub>2</sub> NPs were evaluated by the optical density of the reaction solution at 652 nm or 400-800 nm in a Ultraviolet visible light (UV-vis) spectrophotometer (Lambda 25, PerkinElmer, USA).

### **Kinetic Measurements.**

The steady-state kinetics measurement of CeO<sub>2</sub> NPs was carried out according to a general strategy. Briefly, the final concentration of TMB was varied (0.05–3 mM) in 0.2 M NaAc/HAc buffer (pH = 3.8) containing 10  $\mu$ g/mL CeO<sub>2</sub> NPs, keeping the total volume of the reaction solution at 1 mL. The absorbance change at 652 nm was monitored for 3 min with a 20 s time interval in a UV-vis spectrophotometer (Lambda 25, PerkinElmer, USA) to obtain the initial velocities at different substrate concentrations. The Michaelis-Menten curve was obtained by fitting the initial velocity values and the substrate concentrations to the Michaelis-Menten equation as follows:

$$\frac{1}{V} = \frac{1}{V_{max}} + \frac{K_m}{V_{max}[S]}$$

Where  $V$  is the initial velocity,  $V_{max}$  represents the maximum reaction velocity,  $[S]$

is the substrate concentration. The Michaelis-Menten constant ( $K_m$ ) and  $V_{max}$  were calculated by a Line-Burk plot.

#### **Detection of L-PA and GSH.**

In the detection of L-PA, 10  $\mu$ L CeO<sub>2</sub> NPs (10 mg/mL), 20  $\mu$ L TMB (5 mM) and 40  $\mu$ L L-PA solution with different concentrations (10–500  $\mu$ M) were added into 930  $\mu$ L 0.2 M NaAc/HAc buffer (pH = 3.8). Then the reaction solution was incubated in metal bath at 50°C for 20 min, and finally cooled in an ice bath for 10 min. Finally, the absorbance of the reaction solution at 652 nm or 400-800 nm was measured.

In the detection of GSH, 10  $\mu$ L CeO<sub>2</sub> NPs (10 mg/mL) and 20  $\mu$ L TMB (5 mM) were added into 870  $\mu$ L 0.2 M NaAc/HAc buffer (pH = 3.8). After been incubated in metal bath at 50°C for 20 min 100  $\mu$ L GSH solution with different concentrations (9–250  $\mu$ M) were added and the mixture was immediately cooled in an ice bath for 10 min. Finally, the absorbance of the reaction solution at 652 nm or 400-800 nm was measured.

#### **Selectivity study of the CeO<sub>2</sub>–TMB system for the detection of L-PA and GSH.**

Selectivity study of the CeO<sub>2</sub>–TMB system for the detection of L-PA was performed by replacing 0.1 mM L-PA with 0.5 mM interfering substance (ampicillin sodium, K<sup>+</sup>, Ca<sup>2+</sup>, Na<sup>+</sup>, Mg<sup>2+</sup>, Cl<sup>-</sup>, SO<sub>4</sub><sup>2-</sup>, CO<sub>3</sub><sup>2-</sup>, HCO<sub>3</sub><sup>-</sup>, glucose, fructose, lactose, galactose, sucrose, lysine, serine, tryptophan, phenylalanine, valine and isoleucine).

Selectivity study of the CeO<sub>2</sub>–TMB system for the detection of GSH was performed by replacing 0.05 mM GSH with 0.05 mM L-PA or 0.5 mM other interfering substance (K<sup>+</sup>, Ca<sup>2+</sup>, Na<sup>+</sup>, Mg<sup>2+</sup>, Cl<sup>-</sup>, SO<sub>4</sub><sup>2-</sup>, CO<sub>3</sub><sup>2-</sup>, HCO<sub>3</sub><sup>-</sup>, glucose, fructose, lactose, galactose, sucrose, lysine, serine, tryptophan, phenylalanine, valine and isoleucine).

#### **Detection of L-PA and GSH in the Real Samples.**

Tape water, lake water and goat serum were used as real samples in the detection of L-penicillamine. All water samples were taken from Nanjing Tech University. The samples were pretreated by centrifuging at 5000 rpm for 5 minutes and filtrating by 0.22  $\mu\text{m}$  pore-size syringe filter. 10  $\mu\text{L}$   $\text{CeO}_2$  NPs (10 mg/mL), 20  $\mu\text{L}$  TMB (5 mM) and 40  $\mu\text{L}$  sample solutions were added into 930  $\mu\text{L}$  0.2 M NaAc/HAc buffer (pH = 3.8). Then the reaction solution was incubated in metal bath at 50°C for 20 min, and finally cooled in an ice bath for 10 min. The absorbance of the reaction solution at 652 nm was measured.

Glutathione tablets were used as real samples in the detection of GSH. After careful grinding, 0.015 g of glutathione tablets were weighed and ultrasonically dispersed in 100 mL of deionized water. Then the solution was centrifuged at 5000rpm for 5 minutes, and the supernatant was filtered by 0.22  $\mu\text{m}$  pore-size syringe filter. Finally, the filtrate was diluted 50 times with deionized water for use. 10  $\mu\text{L}$   $\text{CeO}_2$  NPs (10 mg/mL) and 20  $\mu\text{L}$  TMB (5 mM) were added into 870  $\mu\text{L}$  0.2 M NaAc/HAc buffer (pH = 3.8). Then the reaction solution was incubated in metal bath at 50°C for 20 min. After adding 100  $\mu\text{L}$  samples, the mixture was immediately cooled in an ice bath for 10 min. Finally, the absorbance of the reaction solution at 652 nm was measured.

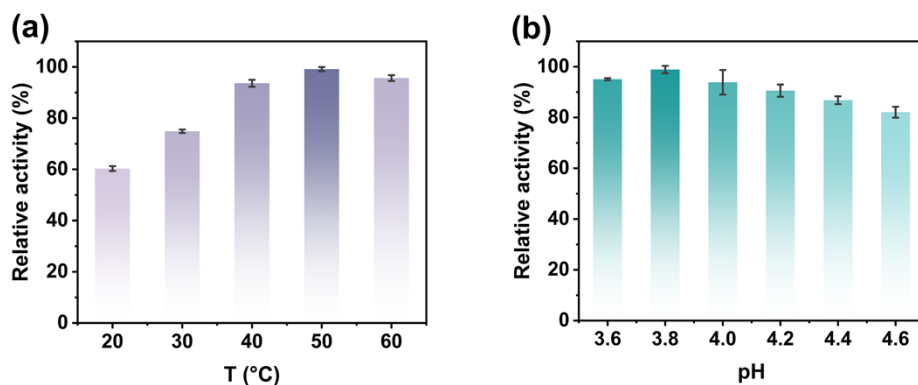

**Figure S1.** Effects of (a) reaction temperature and (b) system pH on the OXD-like activity of the biosynthesized CeO<sub>2</sub> NPs.

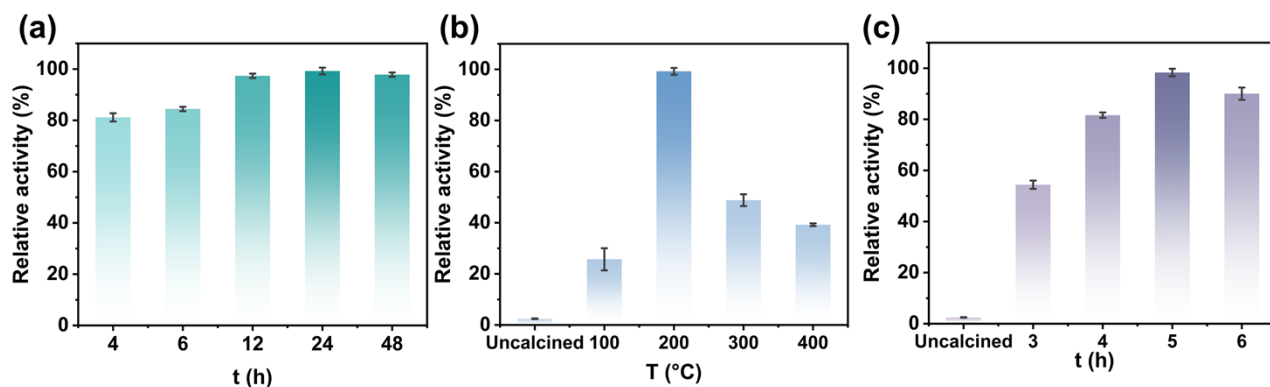

**Figure S2.** Effects of (a) incubate time, (b) calcination temperature, and (c) calcination time on the OXD-like activity of the biosynthesized CeO<sub>2</sub> NPs.



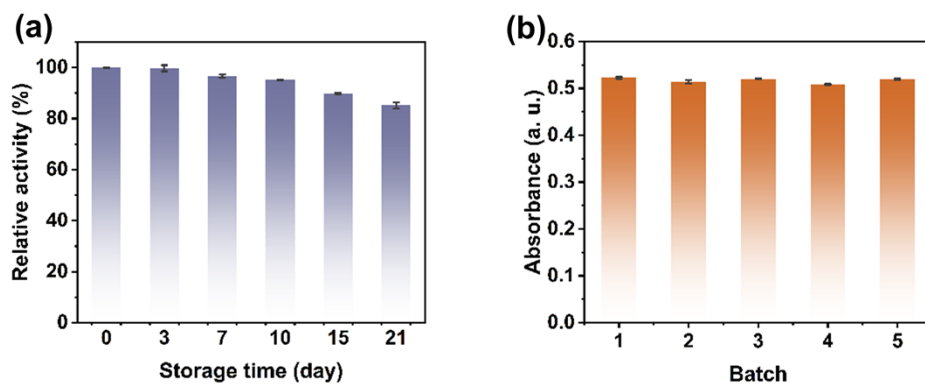

**Figure S3.** The (a) storage and (b) batch stability studies of the biosynthesized CeO<sub>2</sub> NPs.

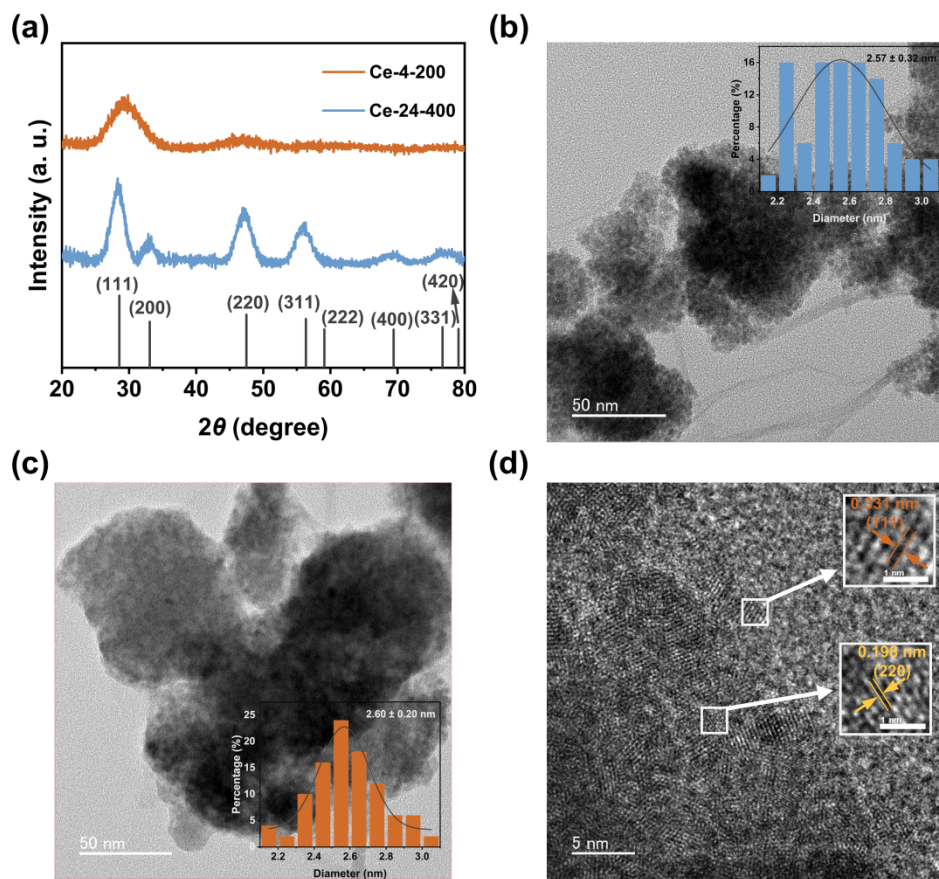

**Figure S4.** (a) The XRD patterns of Ce-4-200 and Ce-24-400. The TEM images (inset the size distributions) of (b) Ce-24-400, and (c) Ce-4-200. (d) The HR-TEM of Ce-4-200.

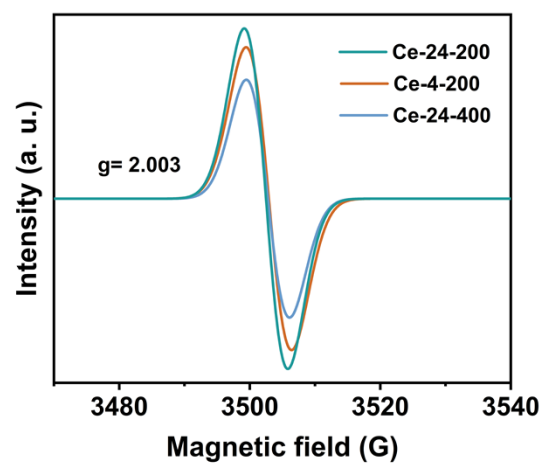

**Figure S5.** The EPR spectra of Ce-4-200, Ce-24-200 and Ce-24-400.

**Table S1.** Comparison of kinetic parameters between biosynthesized CeO<sub>2</sub> NPs and other nanozymes.

| Materials                  | Substrate  | $K_m$ (mM)  | Ref.             |
|----------------------------|------------|-------------|------------------|
| Ag@ZnS                     | TMB        | 4.22        | 1                |
| Cu <sub>3</sub> /ND@G      | TMB        | 2.59        | 2                |
| PdPt <sub>3</sub>          | TMB        | 0.26        | 3                |
| Pd/MMR                     | TMB        | 0.77        | 4                |
| Nanoceria                  | TMB        | 0.42        | 31               |
| 3-CoV MMOs                 | TMB        | 0.44        | 5                |
| Co-POP                     | TMB        | 0.93        | 6                |
| <b>CeO<sub>2</sub> NPs</b> | <b>TMB</b> | <b>0.21</b> | <b>This work</b> |

**Table S2.** The ratio of Ce<sup>3+</sup>, O<sub>β</sub>, and the intensity ratio of D and G band (I<sub>D</sub>/I<sub>G</sub>) of Ce-4-200, Ce-24-400, and Ce-24-200.

| Materials        | Ce <sup>3+</sup> ratio (%) | O <sub>β</sub> ration (%) | IF2g/IVo    | I <sub>D</sub> /I <sub>G</sub> |
|------------------|----------------------------|---------------------------|-------------|--------------------------------|
| Ce-24-200        | 43.32                      | 60.17                     | 0.58        | 1.08                           |
| Ce-4-200         | 40.11                      | 57.17                     | 0.34        | 1.13                           |
| <b>Ce-24-400</b> | <b>28.40</b>               | <b>46.47</b>              | <b>0.16</b> | <b>0.16</b>                    |

**Table S3.** Comparison with the L-PA or D-PA detection results of other detection systems.

| Materials                             | Methods             | D/L-PA      | Linear range ( $\mu\text{M}$ ) | Ref.             |
|---------------------------------------|---------------------|-------------|--------------------------------|------------------|
| Ag-AuNPs                              | Colorimetric        | L-PA        | 5.0–80.0                       | 7                |
| CeO <sub>2</sub> /Pal NSs             | Colorimetric        | L-PA        | 10–50                          | 8                |
| Pc(OH) <sub>8</sub> -TiO <sub>2</sub> | Colorimetric        | L-PA        | 6–10                           | 9                |
| HH-MoS <sub>2</sub> NTs               | Colorimetric        | D-PA        | 46.9–402                       | 10               |
| SiQDs/DTNB                            | Fluorescence        | D-PA        | 1–20                           | 11               |
| CDs/Hg(II)                            | Fluorescence        | D-PA        | 2–24                           | 12               |
| <b>CeO<sub>2</sub> NPs</b>            | <b>Colorimetric</b> | <b>L-PA</b> | <b>10–500</b>                  | <b>This work</b> |

**Table S4.** Detection of L-PA in real samples by standard addition method.

| Samples               | added ( $\mu\text{M}$ ) | Detected ( $\mu\text{M}$ ) | Recovery (%) | RSD (%) |
|-----------------------|-------------------------|----------------------------|--------------|---------|
| Tape water            | 20                      | 19.42                      | 97.10        | 5.83    |
|                       | 40                      | 39.42                      | 98.55        | 3.91    |
|                       | 60                      | 55.47                      | 92.45        | 11.36   |
|                       | 100                     | 107.13                     | 107.13       | 8.85    |
|                       | 200                     | 233.79                     | 116.90       | 4.18    |
|                       | 300                     | 303.79                     | 101.26       | 8.92    |
| Lake water            | 20                      | 19.42                      | 97.10        | 9.60    |
|                       | 40                      | 42.38                      | 105.96       | 4.40    |
|                       | 60                      | 59.42                      | 99.03        | 6.87    |
|                       | 100                     | 104.35                     | 104.35       | 9.97    |
|                       | 200                     | 212.13                     | 106.06       | 2.97    |
|                       | 300                     | 309.35                     | 103.12       | 1.43    |
| Diluted goat<br>serum | 20                      | 22.14                      | 110.68       | 11.75   |
|                       | 40                      | 44.85                      | 112.13       | 1.65    |
|                       | 60                      | 62.63                      | 104.38       | 3.55    |
|                       | 100                     | 100.46                     | 100.46       | 0.96    |
|                       | 200                     | 218.79                     | 109.40       | 4.40    |
|                       | 300                     | 296.02                     | 98.67        | 2.58    |

**Table S5.** Comparison with the GSH detection results of other detection systems.

| Materials                                                      | Methods              | Linear range ( $\mu\text{M}$ ) | Ref.             |
|----------------------------------------------------------------|----------------------|--------------------------------|------------------|
| BTO NPs                                                        | Colorimetric         | 0.50–20                        | 13               |
| CuPd@H–C <sub>3</sub> N <sub>4</sub>                           | Colorimetric         | 2–40                           | 14               |
| CDs@ZIF-8                                                      | Colorimetric         | 0–100                          | 15               |
| CeO <sub>2</sub> /CuO                                          | fluorescence         | 2–20                           | 16               |
| Ag-CDs                                                         | Colorimetric         | 1–60                           | 17               |
| In <sub>2</sub> O <sub>3</sub> /In <sub>2</sub> S <sub>3</sub> | photoelectrochemical | 1–100                          | 18               |
| <b>CeO<sub>2</sub> NPs</b>                                     | <b>Colorimetric</b>  | <b>9–200</b>                   | <b>This work</b> |

**Table S6.** Detection of GSH in real samples by standard addition method.

| Sample              | added ( $\mu\text{M}$ ) | Detected ( $\mu\text{M}$ ) | Recovery (%) | RSD (%) |
|---------------------|-------------------------|----------------------------|--------------|---------|
| Glutathione Tablets | 0                       | 5.73                       | —            | 4.54    |
|                     | 10                      | 16.24                      | 103.25       | 5.77    |
|                     | 20                      | 25.55                      | 99.30        | 2.69    |
|                     | 40                      | 45.82                      | 100.20       | 3.45    |
|                     | 80                      | 84.26                      | 98.28        | 1.35    |
|                     | 160                     | 165.30                     | 99.74        | 0.32    |

## REFERENCES

- (1) Tian, L.; Huang, Z.; Lu, X.; Wang, T.; Cheng, W.; Yang, H.; Huang, T.; Li, T.; Li, Z. Plasmon-Mediated Oxidase-like Activity on Ag@ZnS Heterostructured Hollow Nanowires for Rapid Visual Detection of Nitrite. *Inorg. Chem.* **2023**, *62* (4), 1659–1666.
- (2) Meng, F.; Peng, M.; Chen, Y.; Cai, X.; Huang, F.; Yang, L.; Liu, X.; Li, T.; Wen, X.; Wang, N.; Xiao, D.; Jiang, H.; Xia, L.; Liu, H.; Ma, D. Defect-rich graphene stabilized atomically dispersed Cu<sub>3</sub> clusters with enhanced oxidase-like activity for antibacterial applications. *Appl. Catal. B-Environ.* **2022**, *301*, 120826.
- (3) Ma, Z.; Dong, L.; Zhang, B.; Liang, B.; Wang, L.; Ma, G.; Wang, L. Lentinan stabilized bimetallic PdPt<sub>3</sub> dendritic nanoparticles with enhanced oxidase-like property for for L-cysteine detection. *Int. J. Biol. Macromol.* **2022**, *216*, 779–788.
- (4) Wang, G.; Feng, N.; Zhao, S.; Song, L.; Zhang, Y.; Tong, J.; Liu, Y.; Kang, X.; Hu, T.; Ahmad Khan, I.; Lu, K.; Wu, H.; Xie, J. Synthesis and DFT calculation of microbe-supported Pd nanocomposites with oxidase-like activity for sensitive detection of nitrite. *Food Chem.* **2024**, *434*, 137422.
- (5) Wang, Y.; Chen, C.; Zhang, D.; Wang, J. Bifunctionalized novel Co-V MMO nanowires: Intrinsic oxidase and peroxidase like catalytic activities for antibacterial application. *Appl. Catal. B-Environ.* **2020**, *261*, 118256.
- (6) Guo, D.; Li, C.; Liu, G.; Luo, X.; Wu, F. Oxidase Mimetic Activity of a Metalloporphyrin-Containing Porous Organic Polymer and Its Applications for Colorimetric Detection of Both Ascorbic Acid and Glutathione. *ACS Sustainable Chem. Eng.* **2021**, *9* (15), 5412–5421.

- (7) Wei, J.; Guo, Y.; Li, J.; Yuan, M.; Long, T.; Liu, Z. Optically Active Ultrafine Au–Ag Alloy Nanoparticles Used for Colorimetric Chiral Recognition and Circular Dichroism Sensing of Enantiomers. *Anal. Chem.* **2017**, *89* (18), 9781–9787.
- (8) Lian, J.; Liu, P.; Liu, Q. Nano-scale minerals in-situ supporting CeO<sub>2</sub> nanoparticles for off-on colorimetric detection of L–penicillamine and Cu<sup>2+</sup> ion. *J. Hazard. Mater.* **2022**, *433*, 128766.
- (9) Wang, L.; Liu, Z.; Yang, Q.; Xie, M.; Liu, Q. Sustainable Phthalocyanine-Modified TiO<sub>2</sub> Nanofilm as a Light-Operated Nanozyme for Colorimetric Determination of L–Penicillamine. *ACS Sustainable Chem. Eng.* **2024**, *12* (6), 2203–2211.
- (10) Nazifi, M.; Ramezani, A. M.; Absalan, G.; Ahmadi, R. Colorimetric determination of D–penicillamine based on the peroxidase mimetic activity of hierarchical hollow MoS<sub>2</sub> nanotubes. *Sensor. Actuat. B-Chem.* **2021**, *332*, 129459.
- (11) Liu, J.; Zhang, J.; Wang, M.; Su, X. Silicon quantum dots based dual-mode fluorometric and colorimetric sensing of D–penicillamine. *Talanta* **2021**, *224*, 121886.
- (12) Yuan, Y.; Zhao, X.; Liu, S.; Li, Y.; Shi, Y.; Yan, J.; Hu, X. A fluorescence switch sensor used for D–Penicillamine sensing and logic gate based on the fluorescence recovery of carbon dots. *Sensor. Actuat. B-Chem.* **2016**, *236*, 565–573.
- (13) Yang, D.; Liu, J.; Hu, W.; Xiao, Y.; Chen, H.; Long, Y.; Zheng, H. Nano-ferroelectric oxidase mimics for colorimetric detection of glutathione. *Sensor. Actuat. B-Chem.* **2023**, *393*, 134170.
- (14) Tang, W.; An, Y.; Chen, J.; Row, K.-H. Multienzyme mimetic activities of holey CuPd@H–C<sub>3</sub>N<sub>4</sub> for visual colorimetric and ultrasensitive fluorometric discriminative detection of glutathione and glucose in physiological fluids. *Talanta* **2022**, *241*, 123221.



- (15) Wang, Y.; Liu, X.; Wang, M.; Wang, X.; Ma, W.; Li, J. Facile synthesis of CDs@ZIF-8 nanocomposites as excellent peroxidase mimics for colorimetric detection of H<sub>2</sub>O<sub>2</sub> and glutathione. *Sensor. Actuat. B-Chem.* **2021**, *329*, 129115.
- (16) Chen, W.; Chen, Y.; Shen, C.; Zhu, X.; Zhu, J.; Weng, L. Deep eutectic solvent-assisted synthesis of CeO<sub>2</sub>/CuO nanozymes for polymer dots integrated ratiometric fluorescence detection of glutathione. *Sensor. Actuat. B-Chem.* **2024**, *414*, 135947.
- (17) Lv, H.; Liu, G.; Zhang, N.; Yang, Z.; Jv, X.; Zhao, B.; Yuan, T. Ag-carbon dots with peroxidase-like activity for colorimetric and SERS dual mode detection of glucose and glutathione. *Talanta* **2024**, *273*, 125898.
- (18) Liu, D.; Bai, X.; Sun, J.; Zhao, D.; Hong, C.; Jia, N. Hollow In<sub>2</sub>O<sub>3</sub>/In<sub>2</sub>S<sub>3</sub> nanocolumn-assisted molecularly imprinted photoelectrochemical sensor for glutathione detection. *Sensor. Actuat. B-Chem.* **2022**, *359*, 131542.
